# Supplementary material for: Performance of a blockwise approach in variable selection using linkage disequilibrium information
Source: PubMed Central journal article supplement (PMC4430909; doi:10.1186/s12859-015-0556-6), 2015-05-08
Supplement: 12859_2015_556_MOESM1_ESM.pdf [file 12859_2015_556_MOESM1_ESM.pdf]

$\rho = 0.4$ , SNP-level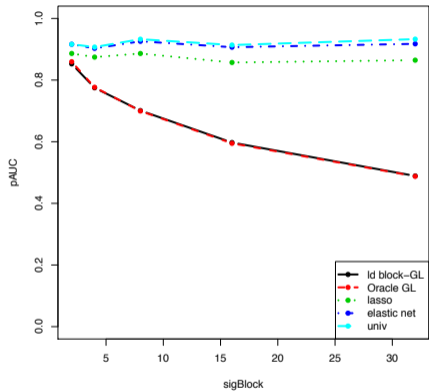 $\rho = 0.4$ , block-level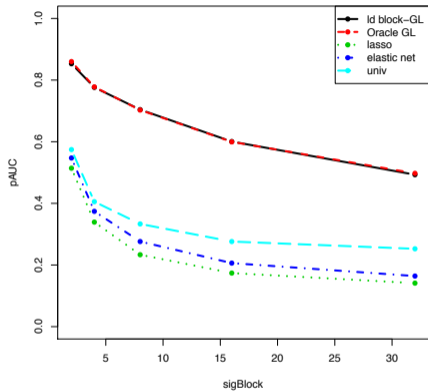

**Figure S1** The mean pAUC versus the size of the LD block containing a single causal SNP sigBlock for the proposed method (“ld block-GL”, black solid lines), oracle Group Lasso (dashed red lines), Lasso (dotted green lines), Elastic-Net (dash-dotted blue lines) and SMA (“univ”, dashed light blue lines), for  $\rho = 0.4$ . Left: SNP-level evaluation. Right: block-level evaluation.
