# Supplementary material for: Performance of a blockwise approach in variable selection using linkage disequilibrium information
Source: PubMed Central journal article supplement (PMC4430909; doi:10.1186/s12859-015-0556-6), 2015-05-08
Supplement: 12859_2015_556_MOESM2_ESM.pdf [file 12859_2015_556_MOESM2_ESM.pdf]

$$\rho = 0.4$$

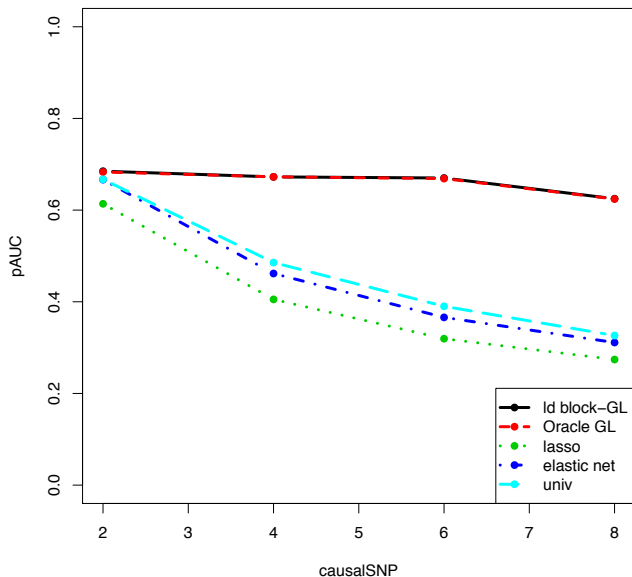

**Figure S2** The mean pAUC as a function of the number of causal SNPs `causalSNP` within a block of size 8, for the proposed method (“ld block-GL”, black solid lines), oracle Group Lasso (dashed red lines), Lasso (dotted green lines), Elastic-Net (dash-dotted blue lines) and SMA (“univ”, dashed light blue lines), for  $\rho = 0.4$ .
