# Supplementary material for: Performance of a blockwise approach in variable selection using linkage disequilibrium information
Source: PubMed Central journal article supplement (PMC4430909; doi:10.1186/s12859-015-0556-6), 2015-05-08
Supplement: 12859_2015_556_MOESM3_ESM.pdf [file 12859_2015_556_MOESM3_ESM.pdf]

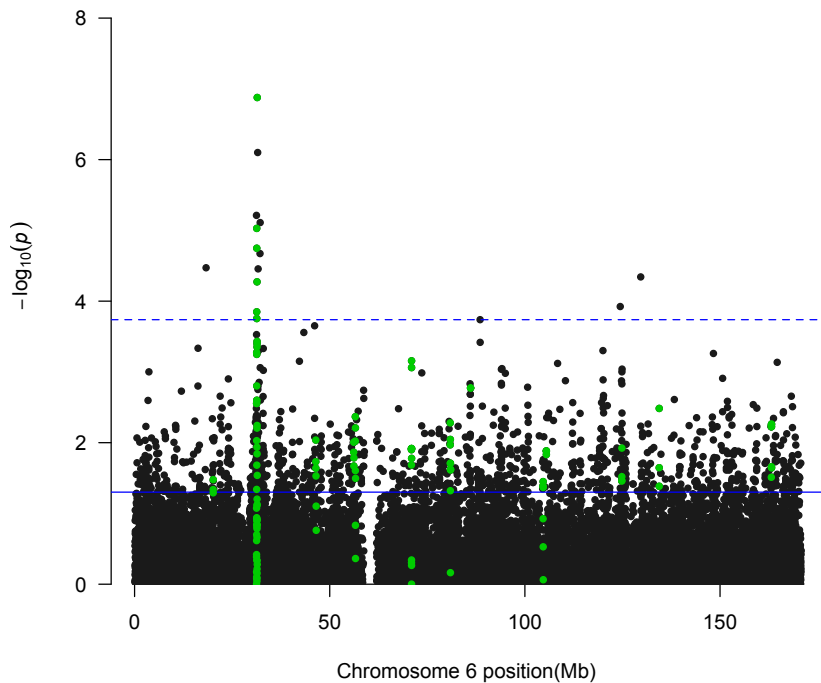

**Figure S3** Manhattan plot for the HIV data results. The markers highlighted in green correspond to the SNPs of the first 15 blocks selected by the proposed approach on the MHC region.
